# Supplementary material for: A high energy density full lithium-ion cell based on specially matched coulombic efficiency
Source: Royal Society of Chemistry journal article supplement (doi:10.1039/c6ta00069j), 2016-01-01
Supplement: c6ta00069j1.pdf [file c6ta00069j1.pdf]

**Electronic Supplementary Information for:**  
**High energy density full lithium-ion cell based on specially  
matched coulombic efficiency**

Bangkun Zou,<sup>a</sup> Qiao Hu,<sup>a</sup> Danqi Qu,<sup>a</sup> Ran Yu,<sup>a</sup> Yuting Zhou,<sup>a</sup> Zhongfeng Tang,<sup>a</sup> and  
Chunhua Chen<sup>\*a</sup>

*a. CAS Key Laboratory of Materials for Energy Conversions, Department of  
Materials Science and Engineering & Collaborative Innovation Center of Suzhou  
Nano Science and Technology, University of Science and Technology of China,  
Anhui Hefei 230026, China*

*\*E-mail: cchchen@ustc.edu.cn; Phone: +86-551-63606971; Fax: (+86)551-63601592.*

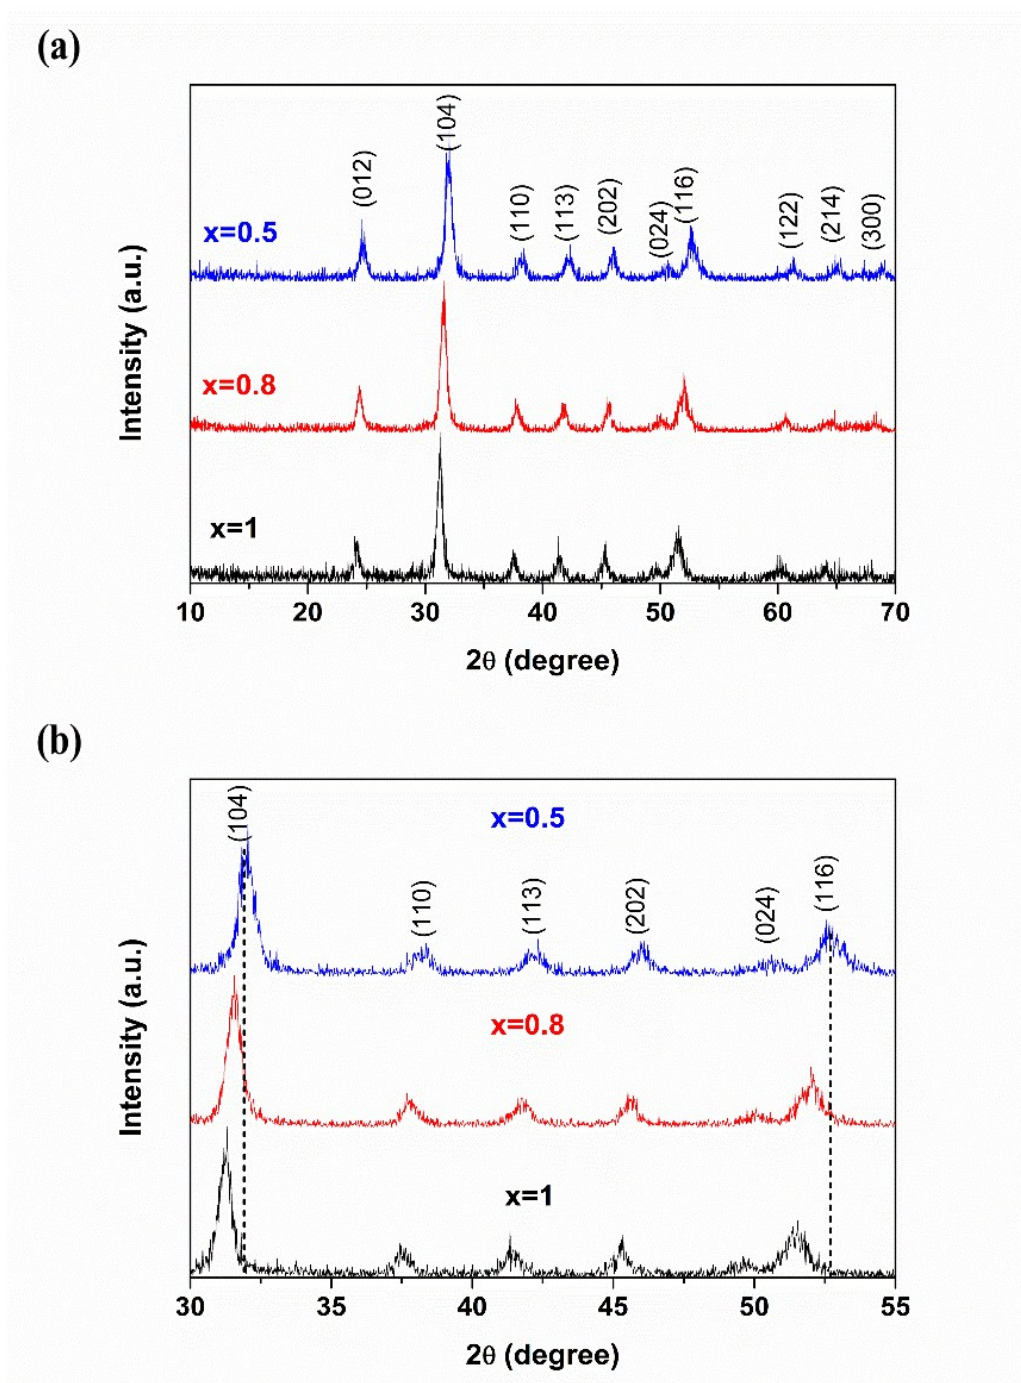

**Fig. S1.** XRD patterns of the as-solvothermal products  $Mn_xCo_{1-x}CO_3$  ( $x=1, 0.8, 0.5$ ), respectively (a). The diffraction patterns from  $30^\circ$  to  $55^\circ$  ( $2\theta$ ) are zoomed (b).

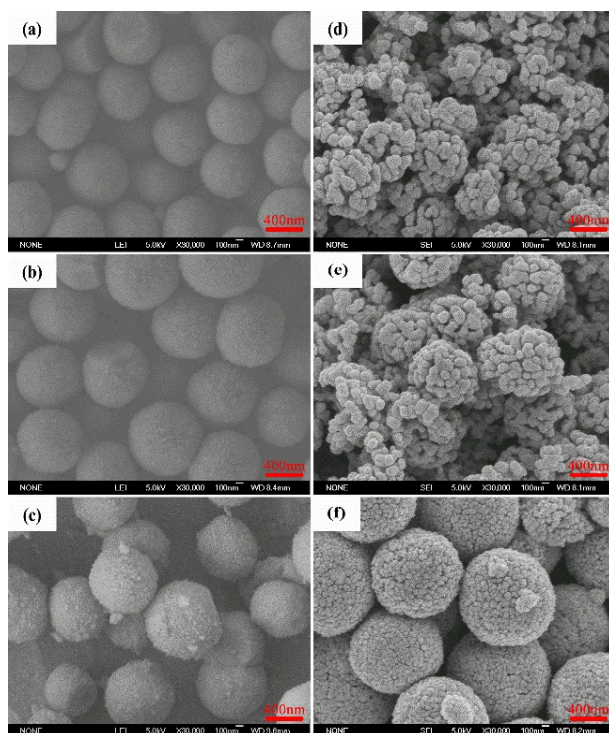

**Fig. S2.** SEM images of the  $Mn_xCo_{1-x}CO_3$  precursors ( $x=1, 0.8, 0.5$ , a-c) and  $Mn_xCo_{1-x}$  oxides intermediates ( $x=1, 0.8, 0.5$ , d-f) after  $600^\circ C$  calcination at air atmosphere.

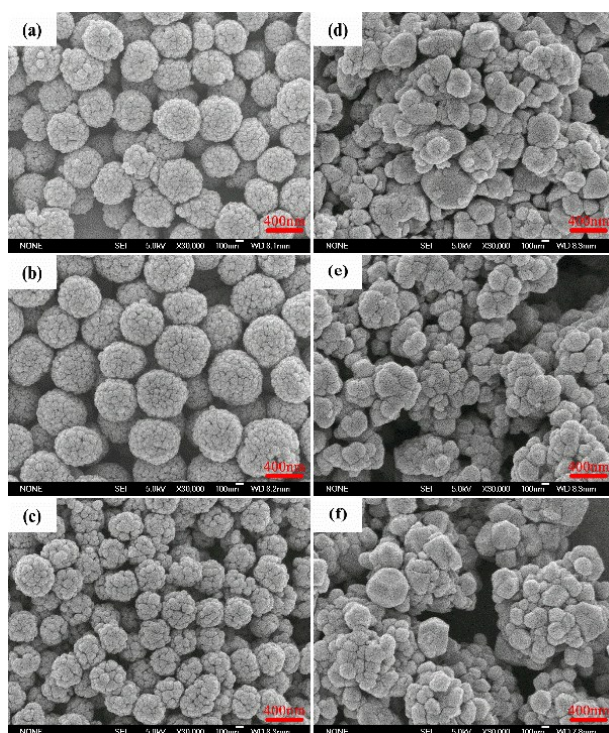

**Fig. S3.** SEM images of the  $Mn_xCo_{1-x}O$  anodes ( $x=1, 0.8, 0.5$ , a-c), Li-rich cathodes with different compositions: LMNO (d), LMNCO (e) and LMCO (f).

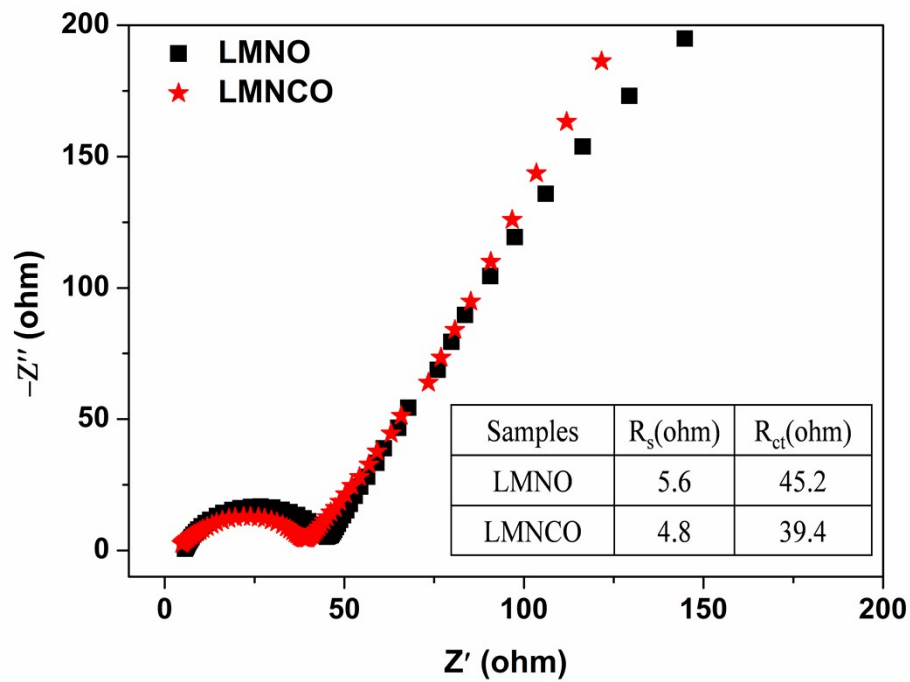

**Fig. S4.** The EIS of Li/LMNO (LMNCO) half-cells after 3 cycles at 0.1C.  $R_s$  represents the ohmic resistance and  $R_{ct}$  is the charge transfer resistance.

**Table S1** The comparison of electrochemical performance of the Li-rich electrodes between this work and previously reported ones

| Li rich materials                                                                                       | Cycling stability                  | Voltage stability                 | Refs      |
|---------------------------------------------------------------------------------------------------------|------------------------------------|-----------------------------------|-----------|
| $\text{Li}_{1.2}\text{Mn}_{0.5}\text{Co}_{0.25}\text{Ni}_{0.05}\text{O}_2$                              | 178.6 @0.8C<br>(89.3%, 100 cycles) | --                                | 1         |
| $\text{Al}_2\text{O}_3$ coated $\text{Li}_{1.2}\text{Ni}_{0.2}\text{Mn}_{0.6}\text{O}_2$                | 192.9@0.2C<br>(90.5%, 100 cycles)  | --                                | 2         |
| Zr doped<br>$\text{Li}_{1.2}\text{Mn}_{0.54}\text{Ni}_{0.13}\text{Co}_{0.13}\text{O}_2$                 | 125@1C<br>(78.6%, 100 cycles)      | --                                | 3         |
| $\text{Li}_{1.231}\text{Mn}_{0.592}\text{Ni}_{0.2}\text{O}_2$                                           | 173.2@1C<br>(89.73%, 69 cycles)    | 3.38 mV /cycle<br>@0.1C           | 4         |
| $\text{LiFePO}_4$ coated<br>$\text{Li}_{1.2}\text{Mn}_{0.54}\text{Ni}_{0.13}\text{Co}_{0.13}\text{O}_2$ | 249.8@0.5C<br>(92.8%, 120 cycles)  | Negligible<br>@0.5C               | 5         |
| Cr doped $\text{Li}_{1.2}\text{Ni}_{0.2}\text{Mn}_{0.6}\text{O}_2$                                      | 200@0.08C<br>(88.5%, 50 cycles)    | $\approx 2.8$ mV /cycle<br>@0.08C | 6         |
| $\text{Li}_{1.2}\text{Mn}_{0.54}\text{Ni}_{0.18}\text{Co}_{0.08}\text{O}_2$                             | 216.5@0.8C<br>(94.2%, 100 cycles)  | 1.4 mV /cycle<br>@0.8C            | 7         |
| $\text{Li}_{1.2}\text{Ni}_{0.2}\text{Mn}_{0.6}\text{O}_2$                                               | 141.3@1C<br>(83.1%, 40 cycles)     | --                                | 8         |
| Sn doped $\text{Li}_{1.2}\text{Ni}_{0.25}\text{Mn}_{0.55}\text{O}_2$                                    | 163@1.2C<br>(92%, 200 cycles)      | --                                | 9         |
| $\text{MgF}_2$ coated<br>$\text{Li}_{1.2}\text{Ni}_{0.17}\text{Co}_{0.07}\text{Mn}_{0.56}\text{O}_2$    | 188@0.1C<br>(86%, 50 cycles)       | --                                | 10        |
| Na doped<br>$\text{Li}_{1.14}\text{Ni}_{0.16}\text{Co}_{0.08}\text{Mn}_{0.57}\text{O}_2$                | 218.4@0.2C<br>(98.8%, 100 cycles)  | --                                | 11        |
| $\text{Li}_{1.2}\text{Ni}_{0.2}\text{Mn}_{0.6}\text{O}_2$                                               | 227.2@0.2C<br>(95.8%, 130 cycles)  | 1.8 mV /cycle<br>@0.2C            | this work |

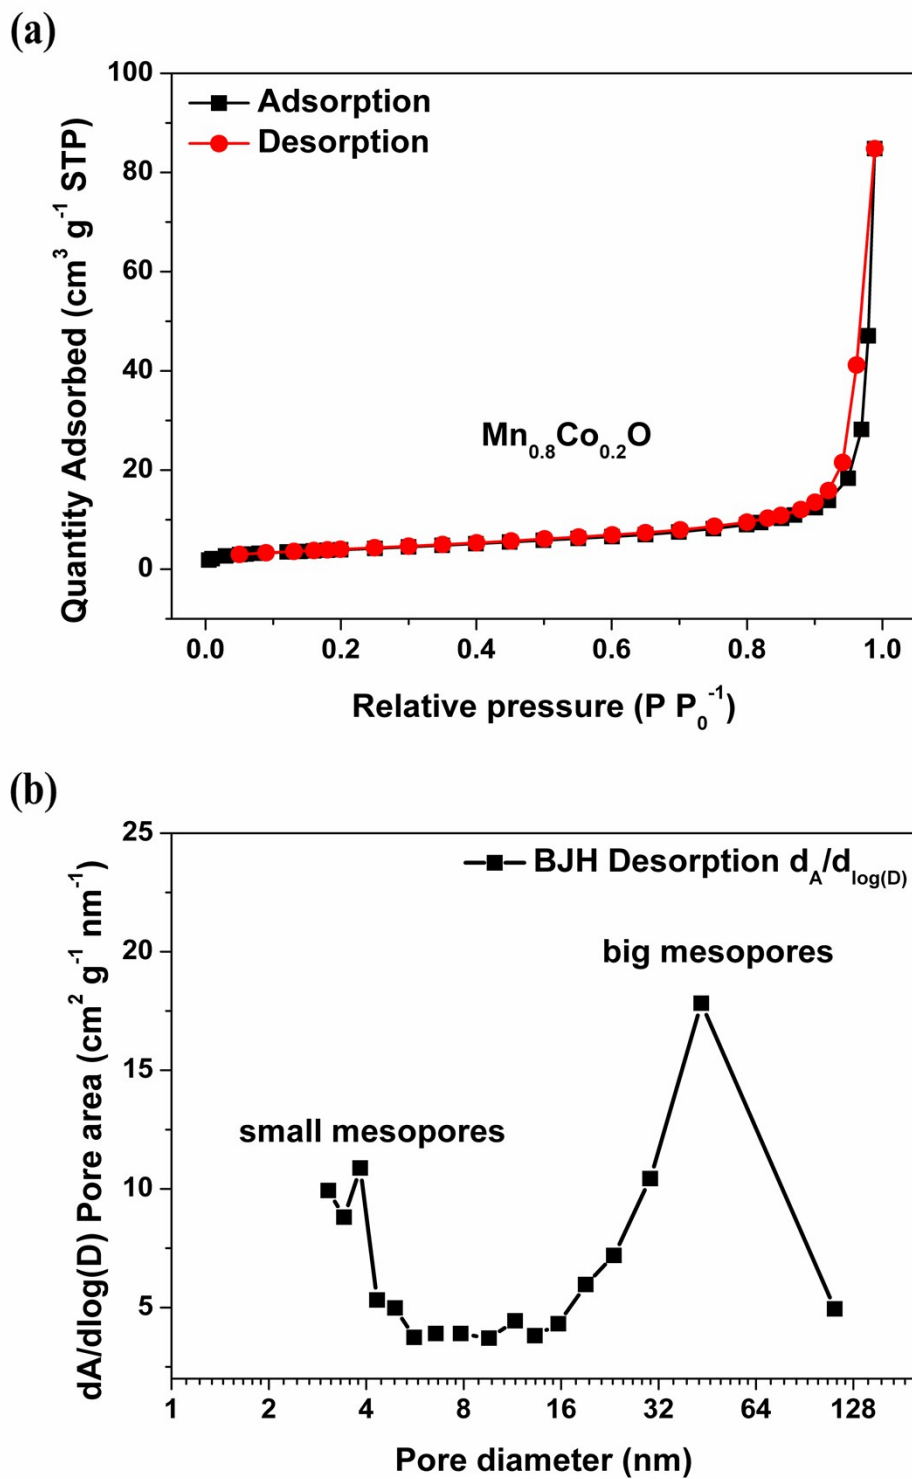

Fig. S5 The  $\text{N}_2$ -adsorption/desorption curves (a), and pore size distribution (b) of  $\text{Mn}_{0.8}\text{Co}_{0.2}\text{O}$  anode.

**Table S2** The comparison of electrochemical performance of the MnO-based electrodes between this work and previously reported ones

| MnO electrodes                        | Cycling stability                      | Rate stability                 | Refs      |
|---------------------------------------|----------------------------------------|--------------------------------|-----------|
| Carbon coated MnO                     | 797.6 @0.1 A/g<br>(112.1%, 50 cycles)  | 429.4 @0.8 A/g<br>323.2 @2 A/g | 12        |
| RGO coated MnO                        | 1044.2 @0.1 A/g<br>(90.8%, 120 cycles) | 750 @0.8 A/g<br>600 @1.6 A/g   | 13        |
| Carbon coated MnO                     | 987.3 @0.1 A/g<br>(80.9%, 150 cycles)  | 532.2 @1 A/g<br>406.1 @3 A/g   | 14        |
| MnO/carbon nanotube composite         | 841 @0.1 A/g<br>(93.4%, 200 cycles)    | 600 @0.76 A/g<br>400 @1.5 A/g  | 15        |
| MnO@C/RGO                             | 863 @0.38 A/g<br>(119.7%, 160 cycles)  | 550 @3.8 A/g<br>415 @7.6 A/g   | 16        |
| MnO<br>yolk–shell sphere              | 1000 @0.2 A/g<br>(107%, 500 cycles)    | 710 @2 A/g<br>513 @4 A/g       | 17        |
| MnO@C                                 | 832 @0.1 A/g<br>(120.6%, 100 cycles)   | 440 @1 A/g<br>315 @2 A/g       | 18        |
| MnO/Graphene                          | 930 @0.5 A/g<br>(147.6%, 500 cycles)   | 500 @0.5 A/g<br>300 @1 A/g     | 19        |
| Carbon coated and N-doped MnO         | 578 @0.1 A/g<br>(95%, 60 cycles)       | 320 @0.5 A/g<br>187 @2 A/g     | 20        |
| Hollow MnO                            | 1050 @0.5 A/g<br>(175%, 150 cycles)    | 770 @0.5 A/g<br>650 @1 A/g     | 21        |
| MnO/C nanopeapods                     | 510 @2 A/g<br>(100%, 1000 cycles)      | 630 @1 A/g<br>470 @5 A/g       | 22        |
| Mn <sub>0.8</sub> Co <sub>0.2</sub> O | 682 @0.4 A/g (110%,<br>200 cycles)     | 583 @4 A/g<br>484 @8 A/g       | this work |

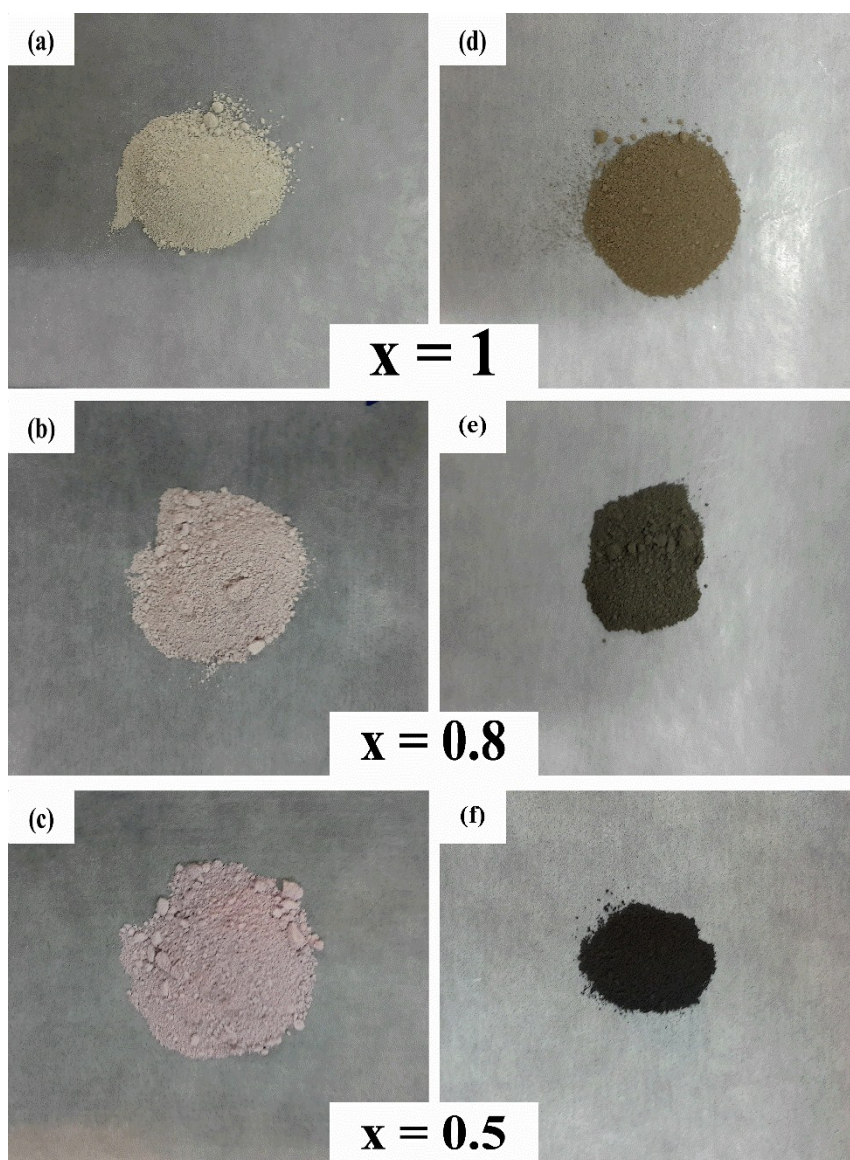

**Fig. S6.** The photos of the  $\text{Mn}_x\text{Co}_{1-x}\text{CO}_3$  precursors ( $x=1, 0.8, 0.5$ , a-c) and the  $\text{N}_2$  calcination products  $\text{Mn}_x\text{Co}_{1-x}\text{O}$  anodes ( $x=1, 0.8, 0.5$ , d-f). The colors change from white to pink with the increase of Co content in the  $\text{Mn}_x\text{Co}_{1-x}\text{CO}_3$  precursors, and the colors of the obtained  $\text{Mn}_x\text{Co}_{1-x}\text{O}$  anodes change from brown to black in a way to provide that the electronic conductive of the anode materials is improved with increasing Co content.



**Table S3** Comparison of electrodes' properties in assembling a full battery

| Properties of electrodes                           | LMNO  | Mn <sub>0.8</sub> Co <sub>0.2</sub> O | Graphite |
|----------------------------------------------------|-------|---------------------------------------|----------|
| Charge specific capacity (mAh g <sup>-1</sup> )    | 345   | 757                                   | 350      |
| Discharge specific capacity (mAh g <sup>-1</sup> ) | 245   | 1040                                  | 372      |
| Initial columbic efficiency                        | 71.0% | 72.8%                                 | 94.1%    |
| Real density (g cm <sup>-3</sup> )                 | ≈2.50 | 5.45                                  | 2.25     |

**References:**

1. S. J. Shi, Z. R. Lou, T. F. Xia, X. L. Wang, C. D. Gu and J. P. Tu, *J. Power Sources*, 2014, **257**, 198-204.
2. L. L. Zhang, J. J. Chen, S. Cheng and H. F. Xiang, *Ceram. Int.*, 2016, **42**, 1870-1878.
3. Z. He, Z. Wang, H. Chen, Z. Huang, X. Li, H. Guo and R. Wang, *J. Power Sources*, 2015, **299**, 334-341.
4. Z. Zheng, S.-X. Liao, B.-B. Xu and B.-H. Zhong, *Ionics*, 2015, **21**, 3295-3300.
5. F. Zheng, C. Yang, X. Xiong, J. Xiong, R. Hu, Y. Chen and M. Liu, *Angew. Chem. Int. Ed.*, 2015, **54**, 13058-13062.
6. E. Lee, J. S. Park, T. P. Wu, C. J. Sun, H. Kim, P. C. Stair, J. Lu, D. H. Zhou and C. S. Johnson, *J. Mater. Chem. A*, 2015, **3**, 9915-9924.
7. Y. D. Zhang, Y. Li, X. Q. Niu, D. H. Wang, D. Zhou, X. L. Wang, C. D. Gu and J. P. Tu, *J. Mater. Chem. A*, 2015, **3**, 14291-14297.
8. Q. Zhang, J. Mei, X. Xie, X. Wang and J. Zhang, *Mater. Res. Bull.*, 2015, **70**, 397-402.
9. Q. Q. Qiao, L. Qin, G. R. Li, Y. L. Wang and X. P. Gao, *J. Mater. Chem. A*, 2015, **3**, 17627-17634.
10. S. Sun, N. Wan, Q. Wu, X. Zhang, D. Pan, Y. Bai and X. Lu, *Solid State Ionics*, 2015, **278**, 85-90.
11. F. Li, Y. Y. Sun, Z. H. Yao, J. S. Cao, Y. L. Wang and S. H. Ye, *Electrochim. Acta*, 2015, **182**, 723-732.

12. J. Liu, N. Chen and Q. Pan, *J. Power Sources*, 2015, **299**, 265-272.
13. G. Xu, F. Jiang, Z.-a. Ren and L.-w. Yang, *Ceram. Int.* 2015, 41, 10680-10688.
14. X. Zhao, Y. Du, L. Jin, Y. Yang, S. Wu, W. Li, Y. Yu, Y. Zhu and Q. Zhang, *Sci. rep.*, 2015, **5**, 14146.
15. X. Cui, Y. Wang, Z. Chen, H. Zhou, Q. Xu, P. Sun, J. Zhou, L. Xia, Y. Sun and Y. Lu, *Electrochim Acta*, 2015, **180**, 858-865.
16. D. H. Liu, H. Y. Lu, X. L. Wu, B. H. Hou, F. Wan, S. D. Bao, Q. Y. Yan, H. M. Xie and R. S. Wang, *J. Mater. Chem. A*, 2015, **3**, 19738-19746.
17. S. B. Wang, C. L. Xiao, Y. L. Xing, H. Z. Xu and S. C. Zhang, *J. Mater. Chem. A*, 2015, **3**, 15591-15597.
18. J. G. Wang, C. B. Zhang, D. D. Jin, K. Y. Xie and B. Q. Wei, *J. Mater. Chem. A*, 2015, **3**, 13699-13705.
19. S. Zhang, L. Zhu, H. Song, X. Chen and J. Zhou, *Nano Energy*, 2014, **10**, 172-180.
20. H. Liu, Z. Li, Y. Liang, R. Fu and D. Wu, *Carbon*, 2015, **84**, 419-425.
21. J. Yue, X. Gu, L. Chen, N. N. Wang, X. L. Jiang, H. Y. Xu, J. Yang and Y. T. Qian, *J. Mater. Chem. A*, 2014, **2**, 17421-17426.
22. H. Jiang, Y. J. Hu, S. J. Guo, C. Y. Yan, P. S. Lee and C. Z. Li, *Acs Nano*, 2014, **8**, 6038-6046.
